# Supplementary material
Source: Springer Nature journal article supplement (https://www.springermedizin.de/resource/supplementary/12888_2013_1552_MOESM1_ESM.pdf/9481364)
Supplement: MOESM1 [file 9481364]

Identification:

384 records identified through database searching  
Medline (117) Embase (167) PsycInfo (41) CINAHL (59)

Screening:

181 duplicates removed

Eligibility:

Title and abstract review  
of 203 prompts full  
review of 43 manuscripts

203 records screened

160 records excluded

43 papers for full review

39 full-text articles excluded\*

- No/not all dementia (n=28)
- Non English language versions of instruments (n=21)\*\*
- Domain specific measures (n=7)
- Non cognitive measure (n=3)
- No test/item information (n=4)
- Foreign language (n=4)

\*most studies were excluded for more than one of these reasons, therefore the total number of exclusions is >39.

\*\*of the 21 articles using non-English language assessments 16 did not meet inclusion criteria for the use of non-dementia samples, three written in foreign languages, one for the use of non-dementia sample and analysis of domain specific measure, and one for lack of test/item information

Included:

4 studies included
